# Supplementary material for: Live Biotherapeutic Lactococcus lactis GEN3013 Enhances Antitumor Efficacy of Cancer Treatment via Modulation of Cancer Progression and Immune System
Source: MDPI journal article supplement (doi:10.3390/cancers14174083), 2022-08-23
Supplement: s1 [file s1]

# Live Biotherapeutic *Lactococcus lactis* GEN3013 Enhances Antitumor Efficacy of Cancer Treatment via Modulation of Cancer Progression and Immune System

Sujeong Kim <sup>2,†</sup>, Yunjae Kim <sup>2,†</sup>, Suro Lee <sup>1</sup>, Yulha Kim <sup>1</sup>, Byungkwan Jeon <sup>1</sup>, Hyerim Kim <sup>1,\*</sup> and Hansoo Park <sup>1,2,\*</sup>

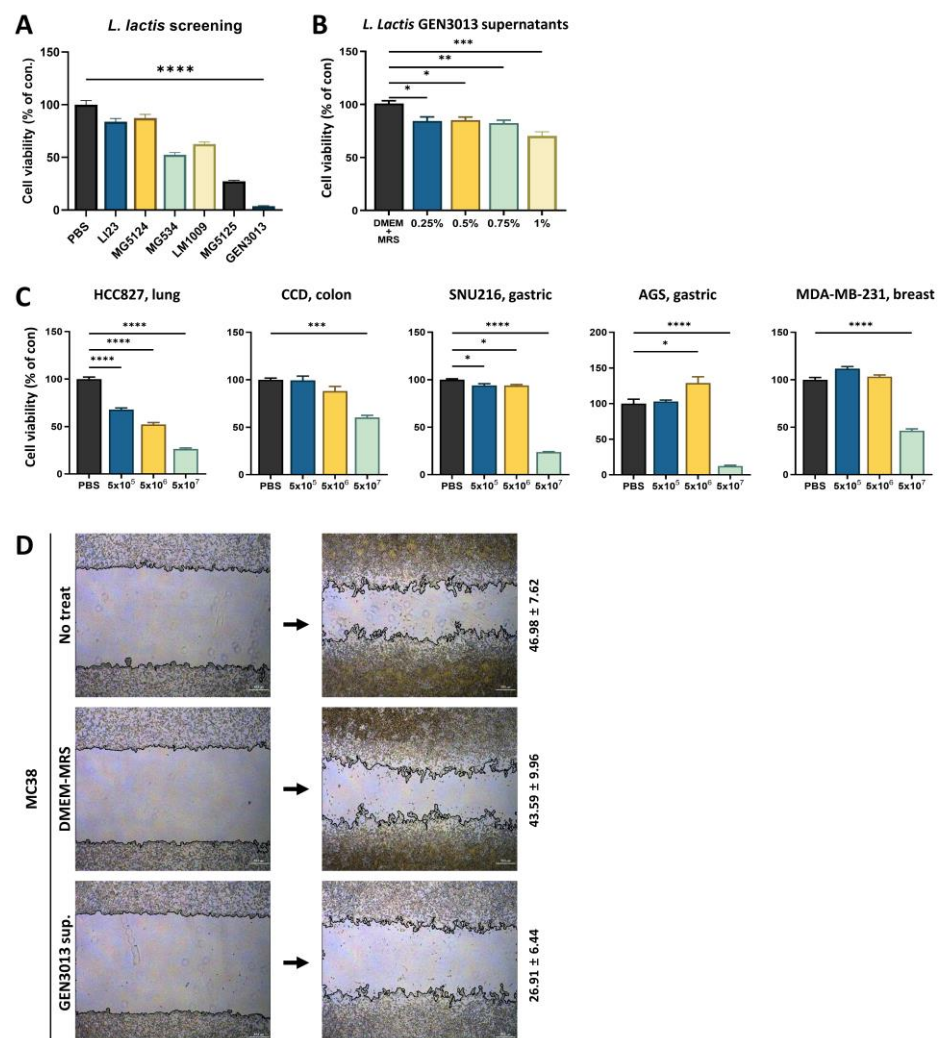

**Supplementary Figure S1. Direct effects of *Lactococcus lactis* GEN3013 on cancer cell lines.** (A) The lysates of several *Lactococcus lactis* strains were treated on MC38 cancer cell lines. The cell viability was measured by MTT assay and calculated relative to PBS control. (B) Various percent concentrations of *L. lactis* GEN3013 supernatants were treated on MC38 cells dose-dependently and incubated for 72 h. The cell viability was measured by WST-8 assay and calculated relative to MRS+DMEM control. (C) Various human cancer cell lines were treated with 0.5% *L. lactis* GEN3013 lysates in dose dependent manner and incubated for 72 h. The cell viability was measured by MTT assay and calculated relative to PBS control. (D) When treating *L. lactis* GEN3013 supernatants (26.91% ± 6.44%) to MC38 cancer cells, it also decreased the mobility of the cancer cells compared to DMEM-MRS mixture control (43.59% ± 9.96%) or no treat control (46.98% ± 7.62%).

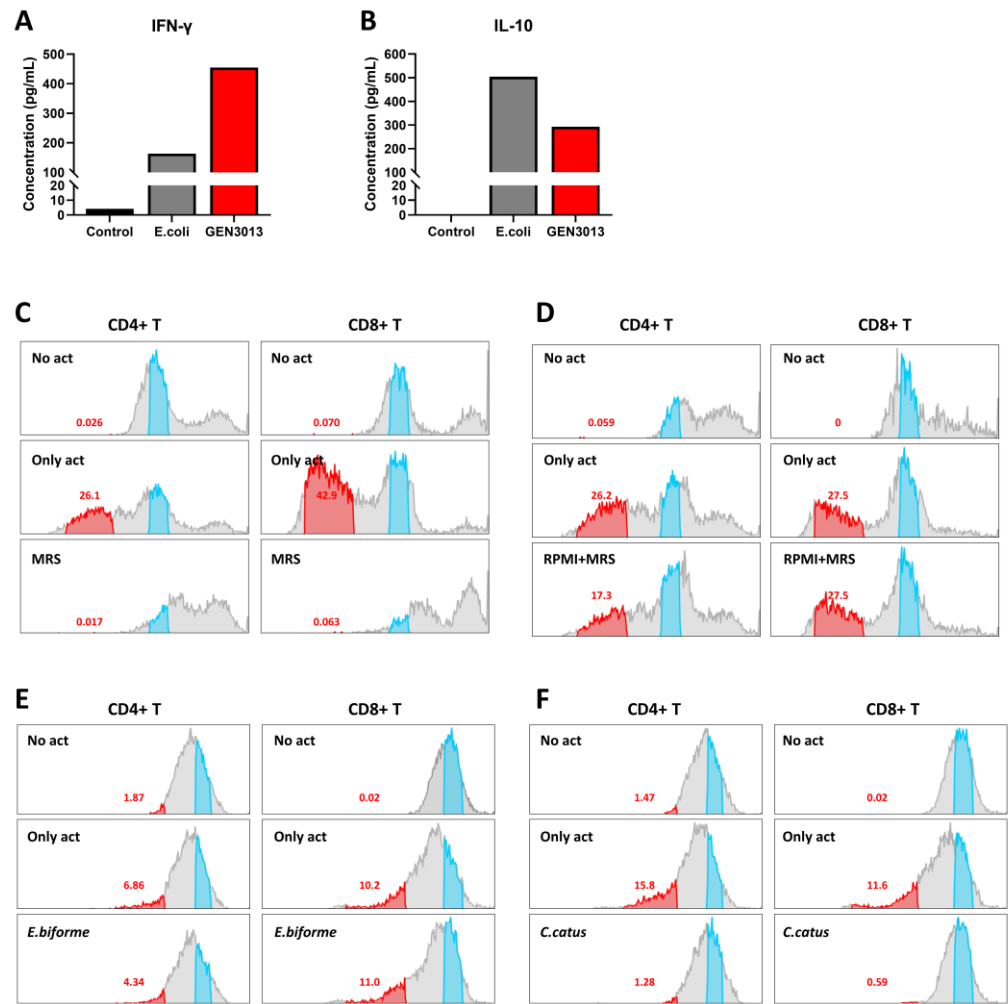

**Supplementary Figure S2. Immune-boosting effects of *Lactococcus lactis* GEN3013.** Human T cell activation was observed by ELISA of IFN-gamma (A) and IL-10 (B) with or without *L. lactis* GEN3013 treatment. Preliminary T cell assay was conducted with two controls, (C) MRS media (bacteria culture media) and (D) a mixture of MRS and RPMI (the culture medium for T cells). Two additional species, which are known not to harm humans, were confirmed by T cell proliferation assay. (E) *E. bifforme* had no significant effect T cell proliferation and (F) *C. catus* inhibited the T cell proliferation.

**Supplementary Table S1. Conditions for metabolic analysis of *Lactococcus lactis* GEN3013-derived metabolites**

|                                | Molecular Weight | Theoretical m/z | Adducts                             | Retention Time (min) | GEN3013 (1) | GEN3013 (2) | GEN3013 (3) | GEN3013 (4) | GEN3013 (5) |
|--------------------------------|------------------|-----------------|-------------------------------------|----------------------|-------------|-------------|-------------|-------------|-------------|
| Vaccenic acid                  | 282.256          | 283.2631568     | [M+H] <sup>+</sup>                  | 30.260               | 6.886       | 6.753       | 6.825       | 6.833       | 6.874       |
| S-Adenosylmethionine           | 398.137          | 399.1445153     | [M+H] <sup>+</sup>                  | 0.810                | 6.927       | 6.636       | 6.799       | 6.699       | 6.733       |
| Oleic acid                     | 282.256          | 299.2591686     | [M-H+H <sub>2</sub> O] <sup>-</sup> | 30.230               | 5.005       | 4.908       | 4.963       | 5.040       | 5.154       |
| N,N-Dimethylformamide          | 73.053           | 145.0982512     | [2M-H] <sup>-</sup>                 | 0.650                | 5.093       | 5.152       | 5.382       | 5.107       | 5.298       |
| Methylthioadenosine            | 297.090          | 298.0968368     | [M+H] <sup>+</sup>                  | 5.950                | 7.371       | 7.235       | 7.351       | 7.320       | 7.249       |
| Indole lactic acid             | 205.074          | 188.070605      | [M+H-H <sub>2</sub> O] <sup>+</sup> | 1.660                | 7.781       | 7.289       | 7.428       | 7.331       | 7.382       |
| GABA (gamma-aminobutyric acid) | 103.063          | 102.0560521     | [M-H] <sup>-</sup>                  | 0.680                | 5.661       | 5.394       | 5.418       | 5.239       | 5.415       |
| Citrate                        | 192.027          | 191.0197261     | [M-H] <sup>-</sup>                  | 0.600                | 6.747       | 6.296       | 6.329       | 6.327       | 6.518       |
| Betaine                        | 117.079          | 116.0717021     | [M-H] <sup>-</sup>                  | 0.700                | 6.193       | 5.666       | 5.770       | 5.610       | 5.772       |

Normalized log<sub>10</sub>, 5 technical replicates
